# Supplementary material for: Metabolic switching is impaired by aging and facilitated by ketosis independent of glycogen
Source: publisher site journal article supplement (doi:10.18632/aging.103116), 2020-05-05
Supplement: Supplementary file [file aging-v12i9-103116-supplementary-material-SD1.pdf]

## SUPPLEMENTARY METHODS

Additionally, a glucose tolerance test (GTT) was administered during the 7<sup>th</sup> week of dietary intervention. While the glucose injection did result in increased circulating glucose expression over time ( $F_{[6,186]} = 34.09$ ;  $p < 0.001$ ; Supplementary Figure 1A), there were no differences across age ( $F_{[1,31]} = 0.14$ ;  $p = 0.71$ ) or diet groups ( $F_{[2,31]} = 1.15$ ;  $p = 0.33$ ), and none of these variables significantly interacted ( $p \geq 0.10$  for all comparisons). Furthermore, there were no differences across age ( $F_{[5,1]} = 0.28$ ;  $p = 0.60$ ) or diet ( $F_{[5,2]} = 2.76$ ;  $p = 0.08$ ) in the AUC (Supplementary Figure 1B). However, injecting glucose did alter circulating levels of BHB differentially across diet groups ( $F_{[2,31]} = 17.30$ ;  $p < 0.001$ ), and diet group significantly interacted with the amount of time post injection ( $F_{[12,186]} = 4.55$ ;

$p < 0.001$ ; Supplementary Figure 1C). While there was a significant effect of time point for all groups ( $F_{[6,186]} = 31.08$ ;  $p < 0.001$ ), there were no differences in BHB response across age groups ( $F_{[1,31]} = 17.30$ ;  $p = 0.06$ ) nor did age interact with time point ( $F_{[6,186]} = 1.54$ ;  $p = 0.17$ ). However, age did significantly interact with diet group ( $F_{[1,31]} = 3.46$ ;  $p = 0.04$ ) such that there was a strong trend for aged free-fed rats to demonstrate lower levels than their diet-matched young counterparts ( $F_{[1,8]} = 4.91$ ;  $p = 0.06$ ), whereas aged KD-fed ( $F_{[1,11]} = 3.25$ ;  $p = 0.10$ ) and aged SD-fed rats ( $F_{[1,12]} = 1.31$ ;  $p = 0.28$ ) did not differ from their diet-matched young counterparts. Finally, there were no differences across age ( $F_{[5,1]} = 0.25$ ;  $p = 0.62$ ) or diet ( $F_{[5,2]} = 0.63$ ;  $p = 0.54$ ) in the AUC (Supplementary Figure 1D).
