# Supplementary material for: Metabolic switching is impaired by aging and facilitated by ketosis independent of glycogen
Source: publisher site journal article supplement (doi:10.18632/aging.103116), 2020-05-05
Supplement: Supplementary file [file aging-v12i9-103116-supplementary-material-SD2.pdf]

## SUPPLEMENTARY FIGURE

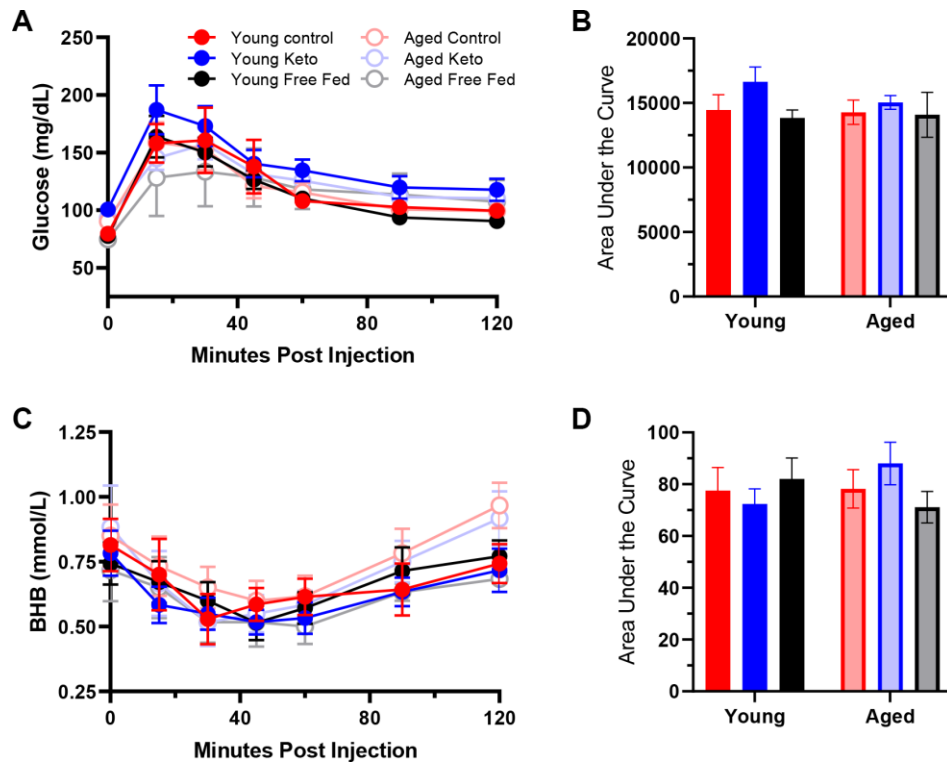

**Supplementary Figure 1. Glucose tolerance testing (GTT) following 7 weeks dietary implementation.** (A) There were no differences in (A) glucose values over time nor (B) area under the curve (AUC) across age or diet groups following an injection of a bolus of glucose intraperitoneally. However, diet did significantly affect (C) BHB values over time, (D) but no differences across age or diet groups were observed in the total AUC following glucose injection. Data are represented as group mean  $\pm$  SEM.
